# Supplementary material for: An industrially applicable Escherichia coli platform for bioconversion of thebaine to oripavine and codeine to morphine
Source: Royal Society of Chemistry journal article supplement (doi:10.1039/d3cc00534h), 2023-01-01
Supplement: d3cc00534h1.pdf [file d3cc00534h1.pdf]

## Materials and Methods

### Chemicals and reagents

Antibiotics, analytical grade glycerol, isopropyl  $\beta$ -D-1-thiogalactopyranoside (IPTG), sodium chloride, sodium ascorbate, glucose, and iron sulfate heptahydrate, HPLC grade acetonitrile, methanol, trifluoroacetic acid (TFA), and acetic acid were purchased from Merck (USA). Restriction enzymes, Phusion High Fidelity DNA Polymerase, NEBuilder HiFi DNA Assembly, *E. coli* 5-alpha competent cells and *E. coli* BL21(DE3) competent cells (an *E. coli* B strain derivative) were purchased from New England BioLabs Inc., USA. Yeast extract and tryptone for medium preparation were purchased from Oxiod, Thermo Scientific, UK. Water for all the experiments was purified to a resistivity of  $\geq 18.2$  M $\Omega$ .cm. Thebaine, oripavine, codeine and morphine and partially processed crude poppy extract (obtained from a manufacturing line run using established optimized extraction methods<sup>1</sup>) were provided by Sun Pharmaceutical Industries Australia Pty Ltd.

### Plasmids and strains

Plasmids used in this study are listed in Supplementary Table 1, primers and synthetic sequences are listed in Supplementary Table 8 and 9. Synthetic gBlock sequences were codon optimized for expression in *E. coli* B strains and ordered from Integrated DNA Technologies (IDT, USA). Sufficient vector homology (~20 bp) for assembly by NEBuilder HiFi DNA Assembly was designed into the gBlocks to speed up construct creation. The T7 polymerase expression vector pET24b-6H-MBP (Merck, USA) was used to control expression of the genes of interest. Each open reading frame (ORF) was *N*-terminally fused to a six-histidine tag (6H) and a maltose binding protein (MBP). In addition, the ORFs were under the transcriptional control of the T7 promoter and the T7 terminator. *E. coli* 5-alpha competent cells were used for plasmid cloning and maintenance, while *E. coli* BL21(DE3) competent cells were used for protein expression and biotransformation. Assembled constructs were verified by sequencing (Australian Genome Research Facility, Australia) using primers UM13/UM03 (see Supplementary Table 8).

The CODM.2 (UniProtKB: D4N502) (referred to here as WT CODM for ease of comparison) expression plasmid employing *E. coli* codon usage, pGWKS100, was created by assembling the

1.1 kb CODM gBlock (UMg4) into the BamHI- and XhoI-linearized pET24b-6H-MBP backbone using NEBuilder.

Several of the expression vectors (pGWKS101, 119-126, see Supplementary Table 1) were created using the same procedure; the wild type residue was replaced with the appropriate residue by PCR amplification (see Supplementary Table 8) and then cloned into the linearized pET24b-6H-MBP expression vector using NEBuilder. For example, to construct the expression vector, pGWKS101, of the endogenous CODM E259K variant (NCBI Reference Sequence: XP\_026416234.1) the glutamic acid (E) residue present within the CODM WT isoform was replaced with a lysine (K) residue by PCR amplification (UM15/UM05 and UM06/UM18) and the two fragments assembled into linearized pET24b-6H-MBP via NEBuilder.

The remaining expression vectors (pGWSK131-133) (see Supplementary Table 1) were created by assembling the respective 1.1 kb ORF gBlocks (UMg8-26) (see Supplementary Table 9) into the linearized pET24b-6H-MBP backbone using NEBuilder.

### **Cell culture and protein expression**

Cells were cultured overnight at 37°C in Lysogeny Broth medium (0.5% yeast extract, 1% tryptone and 1% NaCl) supplemented with kanamycin (50 µg/mL). 1 mL of the overnight cell culture was inoculated into conical flask that contained 50 mL 2-YT medium (1% yeast extract, 1.6% tryptone and 0.5% NaCl), supplemented with kanamycin (50 µg/mL) and 1 mL glycerol. Protein expression was induced by IPTG addition (0.1 mM) when OD600 (optical density measured at 600 nm) reached 0.4-0.8 and continued for 22 hours at 18°C. Following protein expression cells pellets were collected, by centrifugation at 3,000 g for 15 minutes, and resuspended in 15% glycerol to an OD600 of 100 for biotransformation.

### **Whole cell biotransformation**

Biotransformation reactions were conducted in a 20 mL sample volume consisting of the indicated alkaloid (1 mM thebaine, 1 mM codeine or thebaine crude poppy extract), 100 mM phosphate buffer (pH 6.0), 0.5% w/w glucose, 10 µM iron(II) sulfate (FeSO<sub>4</sub>) and 10 mM sodium ascorbate and *E. coli* cells with an OD600 of 10. The reaction was conducted at 24°C with shaking at 220

rpm. Samples were taken regularly at different time intervals. Samples collected were centrifuged, at 16,000 g for 7 minutes, and the supernatant was analyzed by liquid chromatography-mass spectrometer for alkaloid quantification. Three independent replicates were conducted for CODM mutant biotransformations on pure thebaine and codeine, and three for thebaine crude extract biotransformations.

### **Protein expression analysis**

The soluble protein produced by protein expression was determined by SDS-PAGE analysis using the BugBuster™ protocol provided by the manufacturer. Briefly, the soluble protein fraction was liberated from frozen cell pellets, where the OD600 was 1, by resuspension in BugBuster™ protein extraction reagent containing benzonase (25 units/mL of BugBuster™ reagent) (Merck, Germany). The insoluble cell debris and soluble protein containing supernatant were then separated by centrifugation at 16,000 g for 20 minutes and 4°C. The soluble protein fractions were run on a pre-cast Bolt 8% Bis-Tris Plus Gel (ThermoFisher Scientific, USA) in MOPS running buffer at 120 V for 60 minutes. Protein size was estimated using the Precision Plus protein™ Kaleidoscope™ Prestained Protein Standard (Bio-Rad Laboratories, USA). Band intensity (less background intensity and normalized to the 75 kDa molecular weight band) was calculated using the Image Lab software (Bio-Rad Laboratories, USA). Soluble protein expression was determined for each of the CODM mutant assays independent replicates.

### **Statistical analysis**

Minitab® was employed for statistical analysis. A general linear model ANOVA (analysis of variance) was used to determine statistical significance with a P-value of 0.05. Dunnett's method was used to create 95% confidence intervals for comparison against the control strain.

### **LC-MS analysis of alkaloids**

Quantification of alkaloids was performed using a Shimadzu LCMS-2020 liquid chromatograph mass spectrometer. Analysis was carried out on an Onyx Monolithic C18 column (100 x 4.6 mm, Phenomenex Australia Pty Ltd), with a linear gradient of 0-20% buffer B and at a flow rate increased from 1 mL/min to 2.5 mL/min over 10 min at 28°C [buffer A: 0.1% TFA in water; buffer B: 0.1% TFA in acetonitrile]. The detector wavelength was set at 285 nm with the reference

wavelength set at 360 nm. Alkaloid compounds in biotransformation samples were identified by comparing to alkaloid standards, referring to both retention time [morphine at 4.0 min, codeine at 6.8 min, oripavine at 7.5 min and thebaine at 10.1 min] and mass to charge ratio ( $m/z$ ) [morphine 286, codeine 300, oripavine 298 and thebaine 312]. Shimadzu LabSolutions software was used to integrate the peak area for each compound to quantify the concentration of alkaloid in each sample, by referring to the peak area of alkaloid standard series with concentrations ranging from 25  $\mu\text{g/mL}$  to 500  $\mu\text{g/mL}$ . Samples were injected into the LC-MS with a 5  $\mu\text{L}$  injection volume for analysis.

## Supplementary figures and tables

Supplementary Table 1: *E. coli* strains corresponding plasmids used in this study

All strains were made in pET24b-6H-MBP

| Strain      | Plasmid       | Genotype                                                   | Source     |
|-------------|---------------|------------------------------------------------------------|------------|
| NA          | pET24b-6H-MBP | T7 expression vector                                       | Merck      |
| WT CODM     | pGWKS100      | WT CODM (CODM.2) open reading frame (ORF) in pET24b-6H-MBP | This study |
| E259K       | pGWKS101      | CODM E259K (CODM.3) ORF in pET24b-6H-MBP                   | This study |
| E259D       | pGWKS119      | CODM E259D ORF in pET24b-6H-MBP                            | This study |
| E259H       | pGWKS120      | CODM E259H ORF in pET24b-6H-MBP                            | This study |
| E259Q       | pGWKS121      | CODM E259Q ORF in pET24b-6H-MBP                            | This study |
| E259A       | pGWKS122      | CODM E259A ORF in pET24b-6H-MBP                            | This study |
| E259S       | pGWKS123      | CODM E259S ORF in pET24b-6H-MBP                            | This study |
| E259G       | pGWKS124      | CODM E259G ORF in pET24b-6H-MBP                            | This study |
| R260T       | pGWKS125      | CODM R260T ORF in pET24b-6H-MBP                            | This study |
| E259G+R260T | pGWKS126      | CODM E259G+R260T ORF in pET24b-6H-MBP                      | This study |
| R260K       | pGWKS131      | CODM R260K ORF in pET24b-6H-MBP                            | This study |
| E259D+R260K | pGWKS132      | CODM E259D+R260K ORF in pET24b-6H-MBP                      | This study |
| E259G+R260K | pGWKS133      | CODM E259G+R260K ORF in pET24b-6H-MBP                      | This study |

Supplementary Table 2: Average oripavine and morphine yield of the *E. coli* strains expressing CODM mutants with varying amino acids at position 259. Biotransformation was assessed after four hours for oripavine or 30 minutes for morphine. Data are mean  $\pm$  standard deviation of three independent replicates.

| Strain  | Oripavine yield (%) | Oripavine TSY (g/(L·h))                                           | Morphine yield (%) | Morphine TSY (g/(L·h))                                            |
|---------|---------------------|-------------------------------------------------------------------|--------------------|-------------------------------------------------------------------|
| WT CODM | 46 $\pm$ 2          | 3.3 $\times$ 10 <sup>-2</sup> $\pm$ 1.6 $\times$ 10 <sup>-3</sup> | 41 $\pm$ 6         | 2.4 $\times$ 10 <sup>-1</sup> $\pm$ 4.0 $\times$ 10 <sup>-2</sup> |
| E259K   | 29 $\pm$ 2          | 2.1 $\times$ 10 <sup>-2</sup> $\pm$ 1.1 $\times$ 10 <sup>-3</sup> | 30 $\pm$ 3         | 1.8 $\times$ 10 <sup>-1</sup> $\pm$ 2.2 $\times$ 10 <sup>-2</sup> |
| E259D   | 63 $\pm$ 2          | 4.5 $\times$ 10 <sup>-2</sup> $\pm$ 2.4 $\times$ 10 <sup>-3</sup> | 53 $\pm$ 7         | 3.2 $\times$ 10 <sup>-1</sup> $\pm$ 5.6 $\times$ 10 <sup>-2</sup> |
| E259H   | 28 $\pm$ 1          | 2.0 $\times$ 10 <sup>-2</sup> $\pm$ 6.7 $\times$ 10 <sup>-4</sup> | 26 $\pm$ 3         | 1.6 $\times$ 10 <sup>-1</sup> $\pm$ 2.1 $\times$ 10 <sup>-2</sup> |
| E259Q   | 30 $\pm$ 2          | 2.2 $\times$ 10 <sup>-2</sup> $\pm$ 1.4 $\times$ 10 <sup>-3</sup> | 28 $\pm$ 2         | 1.6 $\times$ 10 <sup>-1</sup> $\pm$ 1.6 $\times$ 10 <sup>-2</sup> |
| E259A   | 22 $\pm$ 1          | 1.6 $\times$ 10 <sup>-2</sup> $\pm$ 1.5 $\times$ 10 <sup>-3</sup> | 22 $\pm$ 3         | 1.3 $\times$ 10 <sup>-1</sup> $\pm$ 2.4 $\times$ 10 <sup>-2</sup> |
| E259S   | 25 $\pm$ 1          | 1.8 $\times$ 10 <sup>-2</sup> $\pm$ 1.2 $\times$ 10 <sup>-3</sup> | 26 $\pm$ 3         | 1.5 $\times$ 10 <sup>-1</sup> $\pm$ 2.3 $\times$ 10 <sup>-2</sup> |
| E259G   | 58 $\pm$ 4          | 4.1 $\times$ 10 <sup>-2</sup> $\pm$ 4.3 $\times$ 10 <sup>-3</sup> | 51 $\pm$ 8         | 3.0 $\times$ 10 <sup>-1</sup> $\pm$ 5.4 $\times$ 10 <sup>-2</sup> |

Supplementary Table 3: Average oripavine and morphine yield of the *E. coli* strains expressing CODM mutants with varying amino acids at 259 or 260 or both amino acid residues.

Biotransformation was assessed after four hours for oripavine or 30 minutes for morphine. Data are mean  $\pm$  standard deviation of three independent replicates.

| Strain      | Oripavine yield (%) | Oripavine TSY (g/(L-h))                                           | Morphine yield (%) | Morphine TSY (g/(L-h))                                            |
|-------------|---------------------|-------------------------------------------------------------------|--------------------|-------------------------------------------------------------------|
| WT CODM     | 50 $\pm$ 1          | 3.6 $\times$ 10 <sup>-2</sup> $\pm$ 2.1 $\times$ 10 <sup>-3</sup> | 44 $\pm$ 8         | 2.8 $\times$ 10 <sup>-1</sup> $\pm$ 4.4 $\times$ 10 <sup>-2</sup> |
| E259D       | 65 $\pm$ 1          | 4.6 $\times$ 10 <sup>-2</sup> $\pm$ 6.6 $\times$ 10 <sup>-4</sup> | 59 $\pm$ 1         | 3.8 $\times$ 10 <sup>-1</sup> $\pm$ 1.5 $\times$ 10 <sup>-2</sup> |
| E259G       | 62 $\pm$ 3          | 4.5 $\times$ 10 <sup>-2</sup> $\pm$ 1.5 $\times$ 10 <sup>-3</sup> | 55 $\pm$ 2         | 3.6 $\times$ 10 <sup>-1</sup> $\pm$ 1.7 $\times$ 10 <sup>-2</sup> |
| R260T       | 36 $\pm$ 1          | 2.6 $\times$ 10 <sup>-2</sup> $\pm$ 9.8 $\times$ 10 <sup>-4</sup> | 31 $\pm$ 2         | 2.0 $\times$ 10 <sup>-1</sup> $\pm$ 1.2 $\times$ 10 <sup>-2</sup> |
| E259G+R260T | 53 $\pm$ 3          | 3.4 $\times$ 10 <sup>-2</sup> $\pm$ 3.0 $\times$ 10 <sup>-4</sup> | 48 $\pm$ 3         | 2.7 $\times$ 10 <sup>-1</sup> $\pm$ 2.3 $\times$ 10 <sup>-2</sup> |
| R260K       | 49 $\pm$ 1          | 3.7 $\times$ 10 <sup>-2</sup> $\pm$ 1.8 $\times$ 10 <sup>-3</sup> | 42 $\pm$ 5         | 3.1 $\times$ 10 <sup>-1</sup> $\pm$ 1.2 $\times$ 10 <sup>-2</sup> |
| E259D+R260K | 66 $\pm$ 2          | 4.7 $\times$ 10 <sup>-2</sup> $\pm$ 1.2 $\times$ 10 <sup>-3</sup> | 59 $\pm$ 2         | 3.8 $\times$ 10 <sup>-1</sup> $\pm$ 6.5 $\times$ 10 <sup>-3</sup> |
| E259G+R260K | 63 $\pm$ 2          | 4.5 $\times$ 10 <sup>-2</sup> $\pm$ 6.2 $\times$ 10 <sup>-4</sup> | 53 $\pm$ 3         | 3.4 $\times$ 10 <sup>-1</sup> $\pm$ 1.8 $\times$ 10 <sup>-2</sup> |

Supplementary Table 4: Oripavine yield for the *E. coli* strains expressing WT CODM or mutants E259D or E259G after select time points using thebaine as the substrate. Data are mean  $\pm$  standard deviation of three independent replicates.

| Time (h) | WT CODM yield (%) | WT CODM TSY (g/(L-h))                                             | E259D yield (%) | E259D TSY (g/(L-h))                                               | E259G yield (%) | E259G TSY (g/(L-h))                                               |
|----------|-------------------|-------------------------------------------------------------------|-----------------|-------------------------------------------------------------------|-----------------|-------------------------------------------------------------------|
| 1        | 14 $\pm$ 1        | 3.9 $\times$ 10 <sup>-2</sup> $\pm$ 2.2 $\times$ 10 <sup>-3</sup> | 17 $\pm$ 1      | 4.9 $\times$ 10 <sup>-2</sup> $\pm$ 1.4 $\times$ 10 <sup>-3</sup> | 19 $\pm$ 1      | 5.3 $\times$ 10 <sup>-2</sup> $\pm$ 3.0 $\times$ 10 <sup>-3</sup> |
| 2        | 25 $\pm$ 2        | 3.6 $\times$ 10 <sup>-2</sup> $\pm$ 2.5 $\times$ 10 <sup>-3</sup> | 33 $\pm$ 1      | 4.8 $\times$ 10 <sup>-2</sup> $\pm$ 1.4 $\times$ 10 <sup>-3</sup> | 34 $\pm$ 1      | 4.9 $\times$ 10 <sup>-2</sup> $\pm$ 2.4 $\times$ 10 <sup>-3</sup> |
| 3        | 37 $\pm$ 3        | 3.4 $\times$ 10 <sup>-2</sup> $\pm$ 2.5 $\times$ 10 <sup>-3</sup> | 48 $\pm$ 1      | 4.6 $\times$ 10 <sup>-2</sup> $\pm$ 1.9 $\times$ 10 <sup>-3</sup> | 48 $\pm$ 2      | 4.6 $\times$ 10 <sup>-2</sup> $\pm$ 2.2 $\times$ 10 <sup>-3</sup> |
| 4        | 46 $\pm$ 3        | 3.3 $\times$ 10 <sup>-2</sup> $\pm$ 2.2 $\times$ 10 <sup>-3</sup> | 59 $\pm$ 1      | 4.2 $\times$ 10 <sup>-2</sup> $\pm$ 1.7 $\times$ 10 <sup>-3</sup> | 59 $\pm$ 2      | 4.3 $\times$ 10 <sup>-2</sup> $\pm$ 1.2 $\times$ 10 <sup>-3</sup> |
| 5        | 53 $\pm$ 3        | 3.0 $\times$ 10 <sup>-2</sup> $\pm$ 1.9 $\times$ 10 <sup>-3</sup> | 67 $\pm$ 1      | 3.9 $\times$ 10 <sup>-2</sup> $\pm$ 1.2 $\times$ 10 <sup>-3</sup> | 67 $\pm$ 2      | 3.8 $\times$ 10 <sup>-2</sup> $\pm$ 1.3 $\times$ 10 <sup>-3</sup> |
| 6        | 59 $\pm$ 3        | 2.8 $\times$ 10 <sup>-2</sup> $\pm$ 1.7 $\times$ 10 <sup>-3</sup> | 74 $\pm$ 1      | 3.5 $\times$ 10 <sup>-2</sup> $\pm$ 1.5 $\times$ 10 <sup>-3</sup> | 73 $\pm$ 3      | 3.5 $\times$ 10 <sup>-2</sup> $\pm$ 1.3 $\times$ 10 <sup>-3</sup> |
| 7        | 64 $\pm$ 2        | 2.6 $\times$ 10 <sup>-2</sup> $\pm$ 1.0 $\times$ 10 <sup>-3</sup> | 79 $\pm$ 2      | 3.2 $\times$ 10 <sup>-2</sup> $\pm$ 9.7 $\times$ 10 <sup>-4</sup> | 76 $\pm$ 3      | 3.1 $\times$ 10 <sup>-2</sup> $\pm$ 1.0 $\times$ 10 <sup>-3</sup> |
| 8        | 69 $\pm$ 4        | 2.4 $\times$ 10 <sup>-2</sup> $\pm$ 1.6 $\times$ 10 <sup>-3</sup> | 86 $\pm$ 3      | 3.1 $\times$ 10 <sup>-2</sup> $\pm$ 1.7 $\times$ 10 <sup>-3</sup> | 81 $\pm$ 1      | 2.9 $\times$ 10 <sup>-2</sup> $\pm$ 6.0 $\times$ 10 <sup>-4</sup> |
| 9        | 75 $\pm$ 4        | 2.3 $\times$ 10 <sup>-2</sup> $\pm$ 1.4 $\times$ 10 <sup>-3</sup> | 90 $\pm$ 4      | 2.8 $\times$ 10 <sup>-2</sup> $\pm$ 1.4 $\times$ 10 <sup>-3</sup> | 84 $\pm$ 2      | 2.7 $\times$ 10 <sup>-2</sup> $\pm$ 8.5 $\times$ 10 <sup>-4</sup> |
| 12       | 83 $\pm$ 4        | 2.0 $\times$ 10 <sup>-2</sup> $\pm$ 1.0 $\times$ 10 <sup>-3</sup> | 94 $\pm$ 5      | 2.2 $\times$ 10 <sup>-2</sup> $\pm$ 1.1 $\times$ 10 <sup>-3</sup> | 89 $\pm$ 3      | 2.1 $\times$ 10 <sup>-2</sup> $\pm$ 1.0 $\times$ 10 <sup>-3</sup> |
| 15       | 91 $\pm$ 2        | 1.7 $\times$ 10 <sup>-2</sup> $\pm$ 2.2 $\times$ 10 <sup>-4</sup> | 96 $\pm$ 6      | 1.8 $\times$ 10 <sup>-2</sup> $\pm$ 4.4 $\times$ 10 <sup>-4</sup> | 92 $\pm$ 0      | 1.8 $\times$ 10 <sup>-2</sup> $\pm$ 4.8 $\times$ 10 <sup>-4</sup> |
| 24       | 98 $\pm$ 2        | 1.2 $\times$ 10 <sup>-2</sup> $\pm$ 1.5 $\times$ 10 <sup>-4</sup> | 97 $\pm$ 4      | 1.2 $\times$ 10 <sup>-2</sup> $\pm$ 5.8 $\times$ 10 <sup>-5</sup> | 95 $\pm$ 1      | 1.1 $\times$ 10 <sup>-2</sup> $\pm$ 2.1 $\times$ 10 <sup>-4</sup> |

Supplementary Table 5: Morphine yield for the *E. coli* strains expressing WT CODM or mutants E259D or E259G after select time points using codeine as the substrate. Data are mean  $\pm$  standard deviation of three independent replicates.

| Time (h) | WT CODM yield (%) | WT CODM TSY (g/(L-h))                                             | E259D yield (%) | E259D TSY (g/(L-h))                                               | E259G yield (%) | E259G TSY (g/(L-h))                                               |
|----------|-------------------|-------------------------------------------------------------------|-----------------|-------------------------------------------------------------------|-----------------|-------------------------------------------------------------------|
| 0.25     | 24 $\pm$ 2        | 2.9 $\times$ 10 <sup>-1</sup> $\pm$ 2.4 $\times$ 10 <sup>-2</sup> | 31 $\pm$ 2      | 3.7 $\times$ 10 <sup>-1</sup> $\pm$ 3.1 $\times$ 10 <sup>-2</sup> | 32 $\pm$ 2      | 3.9 $\times$ 10 <sup>-1</sup> $\pm$ 3.9 $\times$ 10 <sup>-2</sup> |
| 0.5      | 48 $\pm$ 4        | 2.8 $\times$ 10 <sup>-1</sup> $\pm$ 2.3 $\times$ 10 <sup>-2</sup> | 58 $\pm$ 3      | 3.5 $\times$ 10 <sup>-1</sup> $\pm$ 2.1 $\times$ 10 <sup>-2</sup> | 59 $\pm$ 2      | 3.6 $\times$ 10 <sup>-1</sup> $\pm$ 1.8 $\times$ 10 <sup>-2</sup> |
| 0.75     | 66 $\pm$ 5        | 2.6 $\times$ 10 <sup>-1</sup> $\pm$ 1.9 $\times$ 10 <sup>-2</sup> | 76 $\pm$ 4      | 3.0 $\times$ 10 <sup>-1</sup> $\pm$ 1.8 $\times$ 10 <sup>-2</sup> | 79 $\pm$ 4      | 3.2 $\times$ 10 <sup>-1</sup> $\pm$ 5.4 $\times$ 10 <sup>-3</sup> |
| 1        | 80 $\pm$ 5        | 2.4 $\times$ 10 <sup>-1</sup> $\pm$ 1.4 $\times$ 10 <sup>-2</sup> | 89 $\pm$ 3      | 2.7 $\times$ 10 <sup>-1</sup> $\pm$ 8.9 $\times$ 10 <sup>-3</sup> | 89 $\pm$ 1      | 2.7 $\times$ 10 <sup>-1</sup> $\pm$ 7.3 $\times$ 10 <sup>-3</sup> |
| 1.25     | 91 $\pm$ 4        | 2.2 $\times$ 10 <sup>-1</sup> $\pm$ 9.9 $\times$ 10 <sup>-3</sup> | 95 $\pm$ 1      | 2.3 $\times$ 10 <sup>-1</sup> $\pm$ 4.4 $\times$ 10 <sup>-3</sup> | 95 $\pm$ 1      | 2.3 $\times$ 10 <sup>-1</sup> $\pm$ 5.9 $\times$ 10 <sup>-3</sup> |
| 2        | 98 $\pm$ 3        | 1.5 $\times$ 10 <sup>-1</sup> $\pm$ 5.3 $\times$ 10 <sup>-3</sup> | 99 $\pm$ 2      | 1.5 $\times$ 10 <sup>-1</sup> $\pm$ 4.4 $\times$ 10 <sup>-3</sup> | 98 $\pm$ 4      | 1.5 $\times$ 10 <sup>-1</sup> $\pm$ 2.8 $\times$ 10 <sup>-3</sup> |
| 2.5      | 98 $\pm$ 4        | 1.2 $\times$ 10 <sup>-1</sup> $\pm$ 5.0 $\times$ 10 <sup>-3</sup> | 99 $\pm$ 2      | 1.2 $\times$ 10 <sup>-1</sup> $\pm$ 4.2 $\times$ 10 <sup>-3</sup> | 97 $\pm$ 5      | 1.2 $\times$ 10 <sup>-1</sup> $\pm$ 4.0 $\times$ 10 <sup>-3</sup> |

Supplementary Table 6: Oripavine time space yield (TSY) for *E. coli* strains expressing WT CODM or mutants E259D or E259G after select time points using raw poppy extract as the substrate. Data are mean  $\pm$  standard deviation of three independent replicates.

| Time (h) | WT CODM yield (%) | WT CODM TSY (g/(L·h))                                             | E259D yield (%) | E259D TSY (g/(L·h))                                               | E259G yield (%) | E259G TSY (g/(L·h))                                               |
|----------|-------------------|-------------------------------------------------------------------|-----------------|-------------------------------------------------------------------|-----------------|-------------------------------------------------------------------|
| 1        | 7 $\pm$ 2         | 2.0 $\times$ 10 <sup>-2</sup> $\pm$ 5.0 $\times$ 10 <sup>-3</sup> | 11 $\pm$ 3      | 3.3 $\times$ 10 <sup>-2</sup> $\pm$ 7.6 $\times$ 10 <sup>-3</sup> | 12 $\pm$ 2      | 3.4 $\times$ 10 <sup>-2</sup> $\pm$ 5.8 $\times$ 10 <sup>-3</sup> |
| 2        | 17 $\pm$ 4        | 2.4 $\times$ 10 <sup>-2</sup> $\pm$ 5.0 $\times$ 10 <sup>-3</sup> | 25 $\pm$ 6      | 3.6 $\times$ 10 <sup>-2</sup> $\pm$ 7.1 $\times$ 10 <sup>-3</sup> | 26 $\pm$ 3      | 3.7 $\times$ 10 <sup>-2</sup> $\pm$ 3.7 $\times$ 10 <sup>-3</sup> |
| 3        | 25 $\pm$ 5        | 2.4 $\times$ 10 <sup>-2</sup> $\pm$ 4.2 $\times$ 10 <sup>-3</sup> | 37 $\pm$ 5      | 3.6 $\times$ 10 <sup>-2</sup> $\pm$ 3.9 $\times$ 10 <sup>-3</sup> | 40 $\pm$ 3      | 3.8 $\times$ 10 <sup>-2</sup> $\pm$ 2.4 $\times$ 10 <sup>-3</sup> |
| 4        | 32 $\pm$ 5        | 2.3 $\times$ 10 <sup>-2</sup> $\pm$ 3.5 $\times$ 10 <sup>-3</sup> | 45 $\pm$ 8      | 3.3 $\times$ 10 <sup>-2</sup> $\pm$ 4.6 $\times$ 10 <sup>-3</sup> | 51 $\pm$ 4      | 3.7 $\times$ 10 <sup>-2</sup> $\pm$ 2.3 $\times$ 10 <sup>-3</sup> |
| 5        | 37 $\pm$ 6        | 2.2 $\times$ 10 <sup>-2</sup> $\pm$ 3.1 $\times$ 10 <sup>-3</sup> | 50 $\pm$ 8      | 2.9 $\times$ 10 <sup>-2</sup> $\pm$ 3.8 $\times$ 10 <sup>-3</sup> | 59 $\pm$ 5      | 3.4 $\times$ 10 <sup>-2</sup> $\pm$ 2.4 $\times$ 10 <sup>-3</sup> |
| 6        | 41 $\pm$ 6        | 2.0 $\times$ 10 <sup>-2</sup> $\pm$ 2.7 $\times$ 10 <sup>-3</sup> | 54 $\pm$ 8      | 2.6 $\times$ 10 <sup>-2</sup> $\pm$ 2.8 $\times$ 10 <sup>-3</sup> | 64 $\pm$ 5      | 3.1 $\times$ 10 <sup>-2</sup> $\pm$ 1.6 $\times$ 10 <sup>-3</sup> |
| 7        | 42 $\pm$ 5        | 1.7 $\times$ 10 <sup>-2</sup> $\pm$ 1.5 $\times$ 10 <sup>-3</sup> | 55 $\pm$ 8      | 2.3 $\times$ 10 <sup>-2</sup> $\pm$ 2.4 $\times$ 10 <sup>-3</sup> | 68 $\pm$ 3      | 2.8 $\times$ 10 <sup>-2</sup> $\pm$ 5.7 $\times$ 10 <sup>-3</sup> |
| 8        | 46 $\pm$ 8        | 1.7 $\times$ 10 <sup>-2</sup> $\pm$ 2.7 $\times$ 10 <sup>-3</sup> | 58 $\pm$ 9      | 2.1 $\times$ 10 <sup>-2</sup> $\pm$ 2.7 $\times$ 10 <sup>-3</sup> | 75 $\pm$ 5      | 2.7 $\times$ 10 <sup>-2</sup> $\pm$ 9.6 $\times$ 10 <sup>-4</sup> |
| 9        | 46 $\pm$ 7        | 1.5 $\times$ 10 <sup>-2</sup> $\pm$ 2.1 $\times$ 10 <sup>-3</sup> | 57 $\pm$ 10     | 1.8 $\times$ 10 <sup>-2</sup> $\pm$ 2.6 $\times$ 10 <sup>-3</sup> | 73 $\pm$ 5      | 2.4 $\times$ 10 <sup>-2</sup> $\pm$ 8.1 $\times$ 10 <sup>-4</sup> |
| 12       | 46 $\pm$ 6        | 1.1 $\times$ 10 <sup>-2</sup> $\pm$ 1.2 $\times$ 10 <sup>-3</sup> | 58 $\pm$ 10     | 1.4 $\times$ 10 <sup>-2</sup> $\pm$ 1.9 $\times$ 10 <sup>-3</sup> | 74 $\pm$ 7      | 1.8 $\times$ 10 <sup>-2</sup> $\pm$ 1.2 $\times$ 10 <sup>-3</sup> |
| 15       | 46 $\pm$ 7        | 9.0 $\times$ 10 <sup>-3</sup> $\pm$ 1.1 $\times$ 10 <sup>-3</sup> | 60 $\pm$ 7      | 1.1 $\times$ 10 <sup>-2</sup> $\pm$ 1.0 $\times$ 10 <sup>-3</sup> | 75 $\pm$ 2      | 1.4 $\times$ 10 <sup>-2</sup> $\pm$ 1.6 $\times$ 10 <sup>-4</sup> |
| 24       | 48 $\pm$ 8        | 5.8 $\times$ 10 <sup>-3</sup> $\pm$ 8.1 $\times$ 10 <sup>-4</sup> | 57 $\pm$ 7      | 6.9 $\times$ 10 <sup>-3</sup> $\pm$ 5.9 $\times$ 10 <sup>-4</sup> | 76 $\pm$ 2      | 9.1 $\times$ 10 <sup>-3</sup> $\pm$ 1.3 $\times$ 10 <sup>-4</sup> |

Supplementary Table 7: Predicted change in WT CODM stability due to presence of the E259G or E259D mutations using the PremPS or INPS-Seq web servers. A negative value represents a stabilizing amino acid for PremPS and a positive value represents a stabilizing amino acid for INPS-Seq.

| Stability prediction web server | E259G                         | E259D                           | Reference |
|---------------------------------|-------------------------------|---------------------------------|-----------|
| PremPS                          | Stabilizing<br>-0.71 kcal/mol | Stabilizing<br>-0.38 kcal/mol   | 2         |
| INPS-Seq                        | Stabilizing<br>0.59 kcal/mol  | Destabilizing<br>-0.02 kcal/mol | 3         |

Supplementary Table 8: Primers used in this study.

The “ $\Delta$ ” primers are generic and thus were used as the upper primer (UM15) and lower primer (UM18) for all fragment 1 and 2 amplification, respectively.

| Primer ID | Name                                | Sequence                  |
|-----------|-------------------------------------|---------------------------|
| UM13      | Sequencing upper                    | GAAATCATGCCGAACATCCC      |
| UM03      | Sequencing lower                    | CCGGATATAGTTCCTCCTTTTCAGC |
| UM05      | CODM E259K fragment 1 lower         | TCCACCGTTTTTCCTTCCGAAT    |
| UM06      | CODM E259K fragment 2 upper         | GATTCGGAAGGAAAAACGGTGGATC |
| UM15      | CODM E259 $\Delta$ fragment 1 upper | CGGTCGTGAGACTGTGCGATGA    |
| UM18      | CODM E259 $\Delta$ fragment 2 lower | TTAGCAGCCGGATCTCAGTG      |
| UM19      | CODM E259D fragment 1 lower         | TCCACCGGTCTTCCTTCCGAAT    |
| UM20      | CODM E259D fragment 2 upper         | GATTCGGAAGGAAGACCGGTGGATC |
| UM21      | CODM E259H fragment 1 lower         | TCCACCGATGTTCTTCCGAAT     |
| UM22      | CODM E259H fragment 2 upper         | GATTCGGAAGGAACATCGGTGGATC |
| UM23      | CODM E259Q fragment 1 lower         | TCCACCGTTGTTCTTCCGAAT     |
| UM24      | CODM E259Q fragment 2 upper         | GATTCGGAAGGAACAACGGTGGATC |
| UM25      | CODM E259A fragment 1 lower         | TCCACCGTGCTTCCTTCCGAAT    |
| UM26      | CODM E259A fragment 2 upper         | GATTCGGAAGGAAGCACGGTGGATC |
| UM27      | CODM E259S fragment 1 lower         | TCCACCGACTTTCCTTCCGAAT    |
| UM28      | CODM E259S fragment 2 upper         | GATTCGGAAGGAAAGTCGGTGGATC |
| UM32      | CODM E259G fragment 1 lower         | TCCACCGACCTTCCTTCCGAAT    |
| UM33      | CODM E259G fragment 2 upper         | GATTCGGAAGGAAGTCGGTGGATC  |



Supplementary Table 9: Open Reading Frames.

All synthetic sequences were ordered from IDT, codon optimized for expression in *E. coli* B strains. Homology regions used for NEBuilder assembly are denoted by underlining.

| Name                  | Sequence                                                                                                                                                                                                                                                                                                                                                                                                                                                                                                                                                                                                                                                                                                                                                                                                                                                                                                                                                                                                                                                                                                                                                                                                                             |
|-----------------------|--------------------------------------------------------------------------------------------------------------------------------------------------------------------------------------------------------------------------------------------------------------------------------------------------------------------------------------------------------------------------------------------------------------------------------------------------------------------------------------------------------------------------------------------------------------------------------------------------------------------------------------------------------------------------------------------------------------------------------------------------------------------------------------------------------------------------------------------------------------------------------------------------------------------------------------------------------------------------------------------------------------------------------------------------------------------------------------------------------------------------------------------------------------------------------------------------------------------------------------|
| <b>CODM WT (UMg4)</b> | <u>CCTGAAAAGACCGCGCAGACTGGATCCATGGAGACCCCAATCTTGATCAAACCTGGCAACGGGCTCTCGATCCCTAGCGTCC</u><br>AAGAGCTCGCCAAGTTGACCCCTGGCCGAGATCCCAAGTCGGTATACATGCACAGGTGAGAGCCCACTTAACAACATCGGT<br>CGGTCAGTAACAGACGATGAAAACGGTGC CGGTCATTGATTTGCAAAACTTATTAAGTCCAGAGCCAGTAGTGGGGAAATT<br>AGAGTTGGACAAGTTACTACTCCGCTTGCAAAGAGTGGGGCTTCTTTAGCTTGTCAACCATGGCGTTGATGCCTTGTAA<br>TGACAACATTAAGAGCGAAATCAAGGGCTTTTAACTGCCGATGAATGAGAAGACCAAATACGGTCAGCAGGACGGC<br>GACTTTGAAGGGTTCGGTCAGCCTTATATTGAATCTGAGGATCAGCGCTTGGATTGGACTGAGGTGTCTCAATGCTCTC<br>GCTGCCACTTCACTGCGCAAGCCGACCTTTTCCAGAACTTCCACTCCGTTTCGCGAGACCCCTGGAGTCGTACTTGA<br>GCAAGATGAAAAAACTGTCAACGGTGGTGTGGAGATGTTAGAAAAGAGTTTGAACCTGTTGAGATTAAGGTATGACT<br>GACTTGTTCGAAGACGGGCTCCAAACGATGCGCATGAATTACTATCTCCATGTCCACGGCTGAGTTGGTATGGGTCT<br>TACAAGTCATAGTACTTTCTGGGTGACCATTTTACTCCAGTAAACGAAGTGGAGGGGTTCAGATTCCGAAGGAAG<br>AGCGGTGGATCAGCATCAAACCGCTTCCAGACGCTTATTGTCAACGTAGGTGATATTTCTGAAAATTAGACCAACGGG<br>ATCTATCGTAGTGTGAGCACCCTGTCAGTGTGAATAGTACCAAGGAGCGGCTTCCATCGCCACATTCATGACTCTAA<br>ATTGGAATCCGAAATCGGTCTTCTCTCGTTGGTACTCTGAGACCCCTGCATTATTAAGCGGGGCGCTACGAAG<br>ACATTTCTCAAGGAAAACCTTTCCGCGAAACTTGATGGCAAGTCTTCTCGGATTACATGCGCATGTGACTCGAGCACCA<br><u>CACCACCACACTGAGATCCGGTCTGA</u> |
| <b>CODM E259K</b>     | ATGGAGACCCCAATCTTGATCAAACCTGGCAACGGGCTCTCGATCCCTAGCGTCCAAGAGCTCGCCAAGTTGACCCCTGGC<br>CGAGATCCCAAGTCGGTATACATGCACAGGTGAGAGCCCACTTAACAACATCGGTGCGTCAGTAACAGACGATGAAAACGG<br>TGCCGGTCATTGATTTGCAAAACTTATTAAGTCCAGAGCCAGTAGTGGGGAAATTAGAGTTGGACAAGTTACTACTCCGCT<br>TGCAAAGAGTGGGGCTTCTTTAGCTTGTCAACCATGGCGTTGATGCCTTGTAAATGGACAACATTAAGAGCGAAATCAA<br>GGGCTTTTTTAACTGCCGATGAATGAGAAGACCAAATACGGTCAGCAGGACGGCGACTTTGAAGGGTTCGGTCAGCCTT<br>ATATTGAATCTGAGGATCAGCGCTTGGATTGGACTGAGGTGTCTCAATGCTCTCGTGCCTTCCACTGCGCAAGCCG<br>CACCTTTTTCCAGAACTTCCACTTCCGTTTCGCGAGACCCCTGGAGTCGACTTGGAGCAAGATGAAAAAACTGTCAACGGT<br>GGTGTGGAGATGTTAGAAAAGAGTTTGAACCTGTTGAGATTAAGGTATGACTGACTTGTTCGAAGACGGGCTCCAAA<br>CGATGCGCATGAATTACTATCTCCATGTCCACGGCTGAGTTGGTATTGGGTCTTACAAGTCATAGTACTTTTCTGGG<br>TTGACCATTTTACTCCAGTAAACGAAGTGGAGGGGTTCAGATTCCGAAGGAAAAACGGTGGATCAGCATCAAACCGCT<br>TCCAGACGCTTTATTGTCAACGTAGGTGATATTTCTGAAAATTATGACCAACGGGATCTATCGTAGTGTGAGCACCCTG<br>CAGTCGTGAATAGTACCAAGGAGCGGCTTCCATCGCCACATTCATGACTCTAAATGGAAATCCGAAATCGGTCTCTATC<br>TCTTCGTTGGTTACTCCTGAGACCCCTGCATTATTAAGCGGGGCGCTACGAAGACATTTCTCAAGGAAAACCTTTTCGCG<br>CAAACCTTGATGGCAAGTCTTCTCGGATTACATGCGCATGTGA                                                                  |
| <b>CODM E259D</b>     | ATGGAGACCCCAATCTTGATCAAACCTGGCAACGGGCTCTCGATCCCTAGCGTCCAAGAGCTCGCCAAGTTGACCCCTGGC<br>CGAGATCCCAAGTCGGTATACATGCACAGGTGAGAGCCCACTTAACAACATCGGTGCGTCAGTAACAGACGATGAAAACGG<br>TGCCGGTCATTGATTTGCAAAACTTATTAAGTCCAGAGCCAGTAGTGGGGAAATTAGAGTTGGACAAGTTACTACTCCGCT<br>TGCAAAGAGTGGGGCTTCTTTAGCTTGTCAACCATGGCGTTGATGCCTTGTAAATGGACAACATTAAGAGCGAAATCAA<br>GGGCTTTTTTAACTGCCGATGAATGAGAAGACCAAATACGGTCAGCAGGACGGCGACTTTGAAGGGTTCGGTCAGCCTT<br>ATATTGAATCTGAGGATCAGCGCTTGGATTGGACTGAGGTGTCTCAATGCTCTCGTGCCTTCCACTCGCAGCAAGCCG<br>CACCTTTTTCCAGAACTTCCACTTCCGTTTCGCGAGACCCCTGGAGTCGACTTGGAGCAAGATGAAAAAACTGTCAACGGT<br>GGTGTGGAGATGTTAGAAAAGAGTTTGAACCTGTTGAGATTAAGGTATGACTGACTTGTTCGAAGACGGGCTCCAAA<br>CGATGCGCATGAATTACTATCTCCATGTCCACGGCTGAGTTGGTATTGGGTCTTACAAGTCATAGTACTTTTCTGGG<br>TTGACCATTTTACTCCAGTAAACGAAGTGGAGGGGTTCAGATTCCGAAGGAAGACCCGGTGGATCAGCATCAAACCGCT<br>TCCAGACGCTTTATTGTCAACGTAGGTGATATTTCTGAAAATTATGACCAACGGGATCTATCGTAGTGTGAGCACCCTG<br>CAGTCGTGAATAGTACCAAGGAGCGGCTTCCATCGCCACATTCATGACTCTAAATGGAAATCCGAAATCGGTCTCTATC<br>TCTTCGTTGGTTACTCCTGAGACCCCTGCATTATTAAGCGGGGCGCTACGAAGACATTTCTCAAGGAAAACCTTTTCGCG<br>CAAACCTTGATGGCAAGTCTTCTCGGATTACATGCGCATGTGA                                                               |
| <b>CODM E259H</b>     | ATGGAGACCCCAATCTTGATCAAACCTGGCAACGGGCTCTCGATCCCTAGCGTCCAAGAGCTCGCCAAGTTGACCCCTGGC<br>CGAGATCCCAAGTCGGTATACATGCACAGGTGAGAGCCCACTTAACAACATCGGTGCGTCAGTAACAGACGATGAAAACGG<br>TGCCGGTCATTGATTTGCAAAACTTATTAAGTCCAGAGCCAGTAGTGGGGAAATTAGAGTTGGACAAGTTACTACTCCGCT<br>TGCAAAGAGTGGGGCTTCTTTAGCTTGTCAACCATGGCGTTGATGCCTTGTAAATGGACAACATTAAGAGCGAAATCAA<br>GGGCTTTTTTAACTGCCGATGAATGAGAAGACCAAATACGGTCAGCAGGACGGCGACTTTGAAGGGTTCGGTCAGCCTT<br>ATATTGAATCTGAGGATCAGCGCTTGGATTGGACTGAGGTGTCTCAATGCTCTCGTGCCTTCCACTGCGCAAGCCG<br>CACCTTTTTCCAGAACTTCCACTTCCGTTTCGCGAGACCCCTGGAGTCGACTTGGAGCAAGATGAAAAAACTGTCAACGGT<br>GGTGTGGAGATGTTAGAAAAGAGTTTGAACCTGTTGAGATTAAGGTATGACTGACTTGTTCGAAGACGGGCTCCAAA<br>CGATGCGCATGAATTACTATCTCCATGTCCACGGCTGAGTTGGTATTGGGTCTTACAAGTCATAGTACTTTTCTGGG<br>TTGACCATTTTACTCCAGTAAACGAAGTGGAGGGGTTCAGATTCCGAAGGAAGACCCGGTGGATCAGCATCAAACCGCT<br>TCCAGACGCTTTATTGTCAACGTAGGTGATATTTCTGAAAATTATGACCAACGGGATCTATCGTAGTGTGAGCACCCTG<br>CAGTCGTGAATAGTACCAAGGAGCGGCTTCCATCGCCACATTCATGACTCTAAATGGAAATCCGAAATCGGTCTCTATC<br>TCTTCGTTGGTTACTCCTGAGACCCCTGCATTATTAAGCGGGGCGCTACGAAGACATTTCTCAAGGAAAACCTTTTCGCG<br>CAAACCTTGATGGCAAGTCTTCTCGGATTACATGCGCATGTGA                                                                 |
| <b>CODM E259Q</b>     | ATGGAGACCCCAATCTTGATCAAACCTGGCAACGGGCTCTCGATCCCTAGCGTCCAAGAGCTCGCCAAGTTGACCCCTGGC<br>CGAGATCCCAAGTCGGTATACATGCACAGGTGAGAGCCCACTTAACAACATCGGTGCGTCAGTAACAGACGATGAAAACGG<br>TGCCGGTCATTGATTTGCAAAACTTATTAAGTCCAGAGCCAGTAGTGGGGAAATTAGAGTTGGACAAGTTACTACTCCGCT<br>TGCAAAGAGTGGGGCTTCTTTAGCTTGTCAACCATGGCGTTGATGCCTTGTAAATGGACAACATTAAGAGCGAAATCAA<br>GGGCTTTTTTAACTGCCGATGAATGAGAAGACCAAATACGGTCAGCAGGACGGCGACTTTGAAGGGTTCGGTCAGCCTT<br>ATATTGAATCTGAGGATCAGCGCTTGGATTGGACTGAGGTGTCTCAATGCTCTCGTGCCTTCCACTGCGCAAGCCG<br>CACCTTTTTCCAGAACTTCCACTTCCGTTTCGCGAGACCCCTGGAGTCGACTTGGAGCAAGATGAAAAAACTGTCAACGGT<br>GGTGTGGAGATGTTAGAAAAGAGTTTGAACCTGTTGAGATTAAGGTATGACTGACTTGTTCGAAGACGGGCTCCAAA<br>CGATGCGCATGAATTACTATCTCCATGTCCACGGCTGAGTTGGTATTGGGTCTTACAAGTCATAGTACTTTTCTGGG<br>TTGACCATTTTACTCCAGTAAACGAAGTGGAGGGGTTCAGATTCCGAAGGAAGACCCGGTGGATCAGCATCAAACCGCT<br>TCCAGACGCTTTATTGTCAACGTAGGTGATATTTCTGAAAATTATGACCAACGGGATCTATCGTAGTGTGAGCACCCTG<br>CAGTCGTGAATAGTACCAAGGAGCGGCTTCCATCGCCACATTCATGACTCTAAATGGAAATCCGAAATCGGTCTCTATC<br>TCTTCGTTGGTTACTCCTGAGACCCCTGCATTATTAAGCGGGGCGCTACGAAGACATTTCTCAAGGAAAACCTTTTCGCG<br>CAAACCTTGATGGCAAGTCTTCTCGGATTACATGCGCATGTGA                                                                 |



TGCAAAGAGTGGGGCTTCTTTTCAGCTTGTCAACCATGGCGTTGATGCCTTGTTAATGGACAACATTAAGAGCGAAATCAA  
GGGCTTTTTTAACTGCGGATGAATGAGAAGACCAATACGGTCAGCAGGACGGCGACTTTGAAGGGTTCCGGTCAGCCTT  
ATATTGAATCTGAGGATCAGCGCTTGGATTGGACTGAGGTGTTCTCAATGCTCTCGTGCCACTTCACCTGCGCAAGCCG  
CACCTTTTTCCAGAACTTCCACTTCCGTTTCGCGAGACCCTGGAGTCGTAAGTGAAGCAAGATGAAAAAACTGTCAACGGT  
GGTGTGTTGAGATGTTAGAAAAGAGTTTGAACCTTGTGAGATTAAGGTATGACTGACTTGTTCGAAGACGGGCTCCAAA  
CGATGCGCATGAATTACTATCCTCCATGTCCACGGCCTGAGTTGGTATTGGGTCTTACAAGTCATAGTACTTTTTCTGGG  
TTGACCATTTTTACTCCAGTTAAACGAAGTGGAGGGTTGCAGATTCGGAAGGAAGGTacgTGGATCAGCATCAAACCGCT  
TCCAGACGCCTTTATTGTCAACGTAGGTGATATTCTCGAAATATGACCAACGGGATCTATCGTAGTGTGAGCACCGTG  
CAGTCGTGAATAGTACCAAGGAGCGGCTTTCCATCGCCACATTCATGACTCTAAATGGAATCCGAAATCGGTCTTATC  
TCTTCGTTGGTTACTCTGAGACCCCTGCATTATTCAAGCGCGGGCCTACGAAGACATTCTCAAGGAAAACCTTTCGCG  
CAAACCTTGATGGCAAGTCTTCTCTGGATTACATGCGCATGTGA

**CODM R260K  
(UMg11)**

CGGTCGTCAGACTGTCGATGAAGCCCTGAAAGACGCGCAGACTGGATCCATGGAGACCCCAATCTTGATCAAACCTTGCCA  
ACGGGCTCTCGATCCCTAGCGTCCAAGAGCTCGCCAAGTTGACCCTGGCCGAGATCCCAAGTCGGTATACATGCACAGGT  
GAGAGCCCACTTAACAACATCGGTGCGTCAGTAACAGACGATGAAACGGTGCCGGTCATTGATTTGCAAAACTTATTAAG  
TCCAGAGCCAGTAGTGGGAAATTAGAGTTGGACAAGTTACTCTCCGCTTGCAAAGAGTGGGGCTTCTTTCAGCTTGTC  
ACCATGGCGTTGATGCCTTGTTAATGGACAACATTAAGAGCGAAATCAAGGGCTTTTTTAACCTGCCGATGAATGAGAAG  
ACCAAATACGGTCAGCAGGACGGCGACTTTGAAGGGTTCCGGTCAGCCTTATATTGAATCTGAGGATCAGCGCTTGGATTG  
GACTGAGGTGTTCTCAATGCTCTCGCTGCCACTTCACCTGCGCAAGCCGCACCTTTTTCCAGAACTTCCACTTCCGTTTC  
GCGAGACCCCTGGAGTCGTAAGTGAAGCAAGATGAAAAAACTGTCAACGGTGGTGTGTTGAGATGTTAGAAAAGAGTTTGCAA  
CTGTTGAGATTAAGGTATGACTGACTTGTTCGAAGACGGGCTCCAACGATGCGCATGAATTACTATCCTCCATGTCC  
ACGGCCTGAGTTGGTATTGGGTCTTACAAGTCATAGTACTTTCTGGGTTGACCATTTACTCCAGTTAAACGAAGTGG  
AGGGGTTGCAGATTCGGAAGGAAGAGaaTGGATCAGCATCAAACCGCTTCCAGACGCCTTTATTGTCAACGTAGGTGAT  
ATTCTCGAAATATGACCAACGGGATCTATCGTAGTGTGAGCACCGTGCAGTCGTGAATAGTACCAAGGAGCGGCTTTC  
CATCGCCACATTCATGACTCTAAATGGAATCCGAAATCGGTCTTCTCTCGTTGGTTACTCTGAGACCCCTGCAT  
TATTCAAGCGCGGGCCTACGAAGACATTCTCAAGGAAAACCTTTCGCGCAAACCTTGATGGCAAGTCTTCTCTGGATTAC  
ATGCGCATGTGACTCGAGCACCACCACCACCACCCTGAGATCCGGCTGCTAA

**CODM  
E259D+R260K  
(UMg12)**

CGGTCGTCAGACTGTCGATGAAGCCCTGAAAGACGCGCAGACTGGATCCATGGAGACCCCAATCTTGATCAAACCTTGCCA  
ACGGGCTCTCGATCCCTAGCGTCCAAGAGCTCGCCAAGTTGACCCTGGCCGAGATCCCAAGTCGGTATACATGCACAGGT  
GAGAGCCCACTTAACAACATCGGTGCGTCAGTAACAGACGATGAAACGGTGCCGGTCATTGATTTGCAAAACTTATTAAG  
TCCAGAGCCAGTAGTGGGAAATTAGAGTTGGACAAGTTACTCTCCGCTTGCAAAGAGTGGGGCTTCTTTCAGCTTGTC  
ACCATGGCGTTGATGCCTTGTTAATGGACAACATTAAGAGCGAAATCAAGGGCTTTTTTAACCTGCCGATGAATGAGAAG  
ACCAAATACGGTCAGCAGGACGGCGACTTTGAAGGGTTCCGGTCAGCCTTATATTGAATCTGAGGATCAGCGCTTGGATTG  
GACTGAGGTGTTCTCAATGCTCTCGCTGCCACTTCACCTGCGCAAGCCGCACCTTTTTCCAGAACTTCCACTTCCGTTTC  
GCGAGACCCCTGGAGTCGTAAGTGAAGCAAGATGAAAAAACTGTCAACGGTGGTGTGTTGAGATGTTAGAAAAGAGTTTGCAA  
CTGTTGAGATTAAGGTATGACTGACTTGTTCGAAGACGGGCTCCAACGATGCGCATGAATTACTATCCTCCATGTCC  
ACGGCCTGAGTTGGTATTGGGTCTTACAAGTCATAGTACTTTCTGGGTTGACCATTTACTCCAGTTAAACGAAGTGG  
AGGGGTTGCAGATTCGGAAGGAAGAGaaaTGGATCAGCATCAAACCGCTTCCAGACGCCTTTATTGTCAACGTAGGTGAT  
ATTCTCGAAATATGACCAACGGGATCTATCGTAGTGTGAGCACCGTGCAGTCGTGAATAGTACCAAGGAGCGGCTTTC  
CATCGCCACATTCATGACTCTAAATGGAATCCGAAATCGGTCTTCTCTCGTTGGTTACTCTGAGACCCCTGCAT  
TATTCAAGCGCGGGCCTACGAAGACATTCTCAAGGAAAACCTTTCGCGCAAACCTTGATGGCAAGTCTTCTCTGGATTAC  
ATGCGCATGTGACTCGAGCACCACCACCACCACCCTGAGATCCGGCTGCTAA

**CODM**

**E259G+R260K**

**(UMg13)**

CGGTCGTCAGACTGTCGATGAAGCCCTGAAAGACGCGCAGACTGGATCCATGGAGACCCCAATCTTGATCAAACCTGGCA  
ACGGGCTCTCGATCCCTAGCGTCCAAGAGCTCGCAAGTTGACCCTGGCCGAGATCCCAAGTCGGTATACATGCACAGGT  
GAGAGCCCACTTAACAACATCGGTGCGTCAGTAACAGACGATGAAACGGTGCCGGTCATTGATTTGCAAACTTATTAAG  
TCCAGAGCCAGTAGTGGGGAAATTAGAGTTGGACAAGTTACACTCCGCTTGCAAAGAGTGGGGCTTCTTTCAGCTTGCA  
ACCATGGCGTTGATGCCTTGTTAATGGACAACATTAAGAGCGAAATCAAGGGCTTTTTTAACCTGCCGATGAATGAGAAG  
ACCAAATACGGTCAGCAGGACGGCGACTTTGAAGGGTTCGGTCAGCCTTATATTGAATCTGAGGATCAGCGCTTGGATTG  
GACTGAGGTGTTCTCAATGCTCTCGCTGCCACTTCACCTGCGCAAGCCGCACCTTTTTCCAGAACTCCACTTCCGTTTC  
GCGAGACCCTGGAGTCGTACTTGAGCAAGATGAAAAAAGTCAACGGTGGTGTGTTGAGATGTTAGAAAAGAGTTTGCAA  
CTTGTGAGATTAAAGGTATGACTGACTTGTTCGAAGACGGGCTCCAAACGATGCGCATGAATTACTATCCTCCATGTCC  
ACGGCCTGAGTTGGTATTGGGTCTTACAAGTCATAGTGACTTTTCTGGGTTGACCATTTTACTCCAGTTAAACGAAGTGG  
AGGGGTTGCAGATTCGGAAGGAaggtaaTGATCAGCATCAAACCGCTTCCAGACGCCTTTATTGTCAACGTAGGTGAT  
ATTCTCGAAATTATGACCAACGGGATCTATCGTAGTGTGAGCACCGTGCAGTCGTGAATAGTACCAAGGAGCGGCTTTC  
CATCGCCACATTCCATGACTCTAAATGGAATCCGAAATCGGTCCTATCTCTTCGTTGGTTACTCCTGAGACCCCTGCAT  
TATTAAGCGCGGGCGCTACGAAGACATTCTCAAGGAAAACCTTTCGCGCAAACCTTGATGGCAAGTCTTTCCTGGATTAC  
ATGCGCATGTGACTCGAGCACCACCACCACCACCTGAGATCCGGCTGCTAA

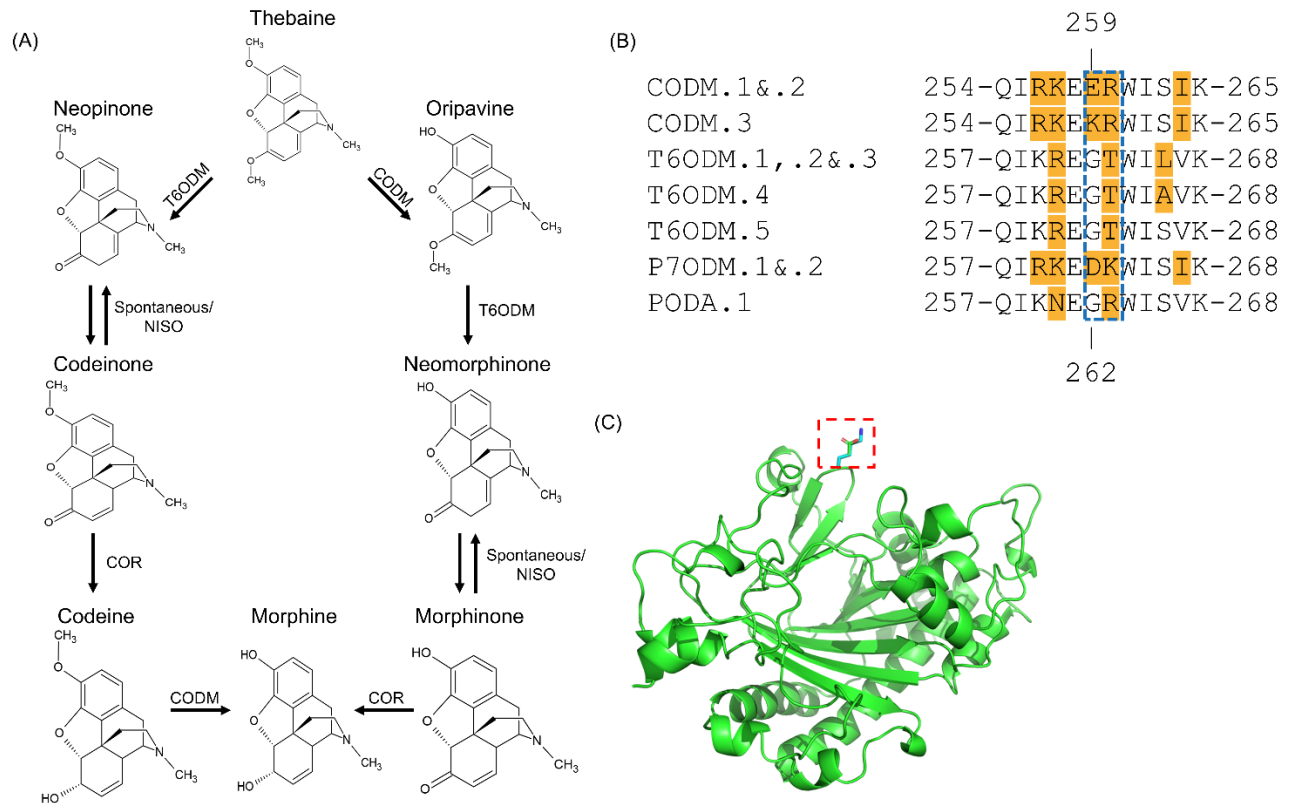

Supplementary Figure. 1 (A) Pathways in *P. somniferum* for the conversion of thebaine to morphine. (B) Sequence alignment of selected region of the three CODM variants (CODM.1,2 and .3), the five T6ODM variants (T6ODM.1,.2,.3,4 and .5), the two P7ODM variants (P7ODM.1 and .2) and the one PODA variant (PODA.1) found within *P. somniferum* HN1.<sup>4</sup> Non-identical residues are highlighted in orange. The navy box indicates the region of interest. T6ODM.1&2 are identical at the protein level while T6ODM.3 differs by a single residue (A81S). P7ODM.1 & .2 differ by two residues: K315Q and K352N. Sequences were aligned using the MUSCLE methodology with SnapGene. (C) Homology model of *P. somniferum* CODM.1/.2 based on the crystal structure of *P. somniferum* T6ODM in complex with succinate (protein databank entry: 5O7Y). SWISS-MODEL was used for model creation.<sup>5</sup> The red box indicates the side chains of amino acid 259, where the single amino acid E259K difference between CODM.1/.2 (green) and CODM.3 (aqua) lies.

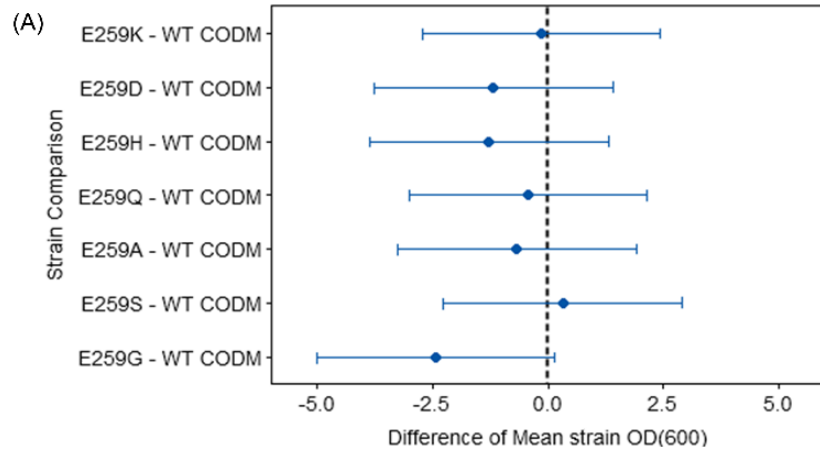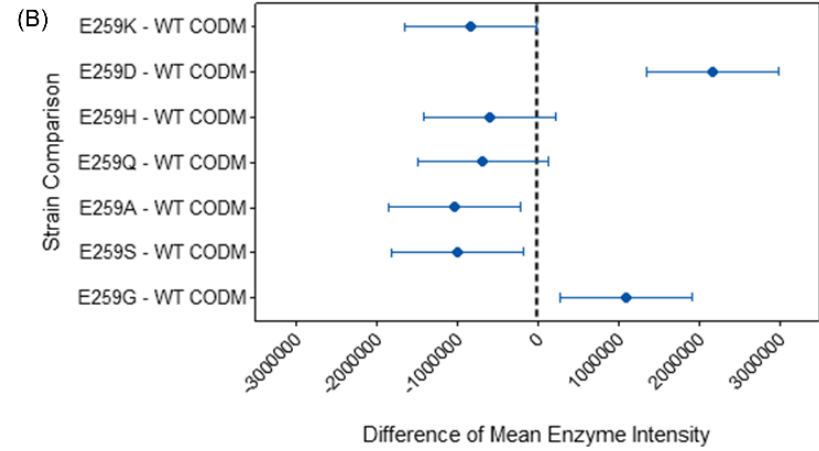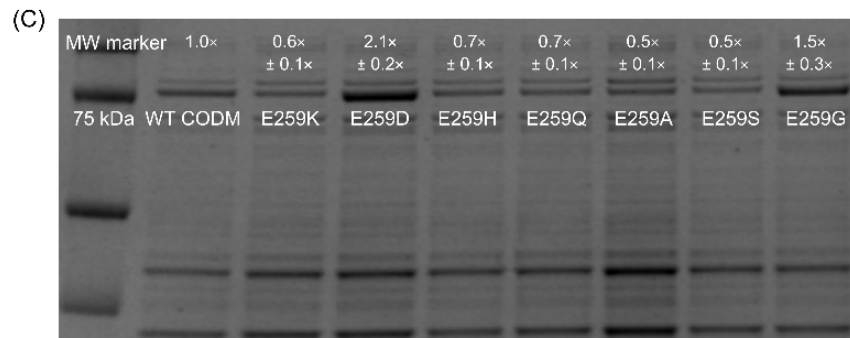

Supplementary Figure. 2 Mean difference in strain OD(600) (A) and mean difference in mutant enzyme intensity (B) of *E. coli* strains following expressing of CODM mutants with varying amino acids at position 259. Data are mean difference of three independent replicates  $\pm$  95% confidence interval. Representative SDS-PAGE (C) image the *E. coli* strains expressing CODM mutants with varying amino acids at position 259. Relative expression data are from semi-quantitative analysis of the SDS-PAGE image and are the mean  $\pm$  standard deviation of three independent replicates.

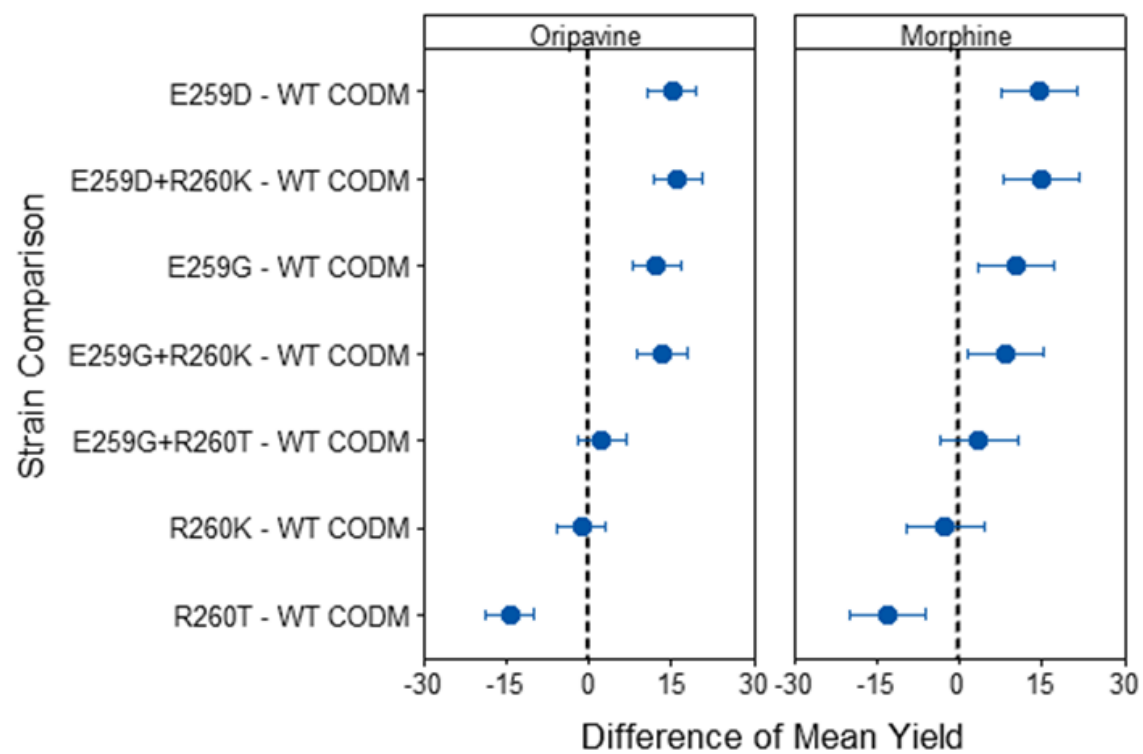

Supplementary Figure. 3 Mean difference of oripavine and morphine yield produced by the *E. coli* strains expressing CODM mutants with varying amino acids at position 259. Biotransformations were conducted for 4 hours to assess oripavine production or 30 minutes to assess morphine production. Data are mean difference of three independent replicates  $\pm$  95% confidence interval.

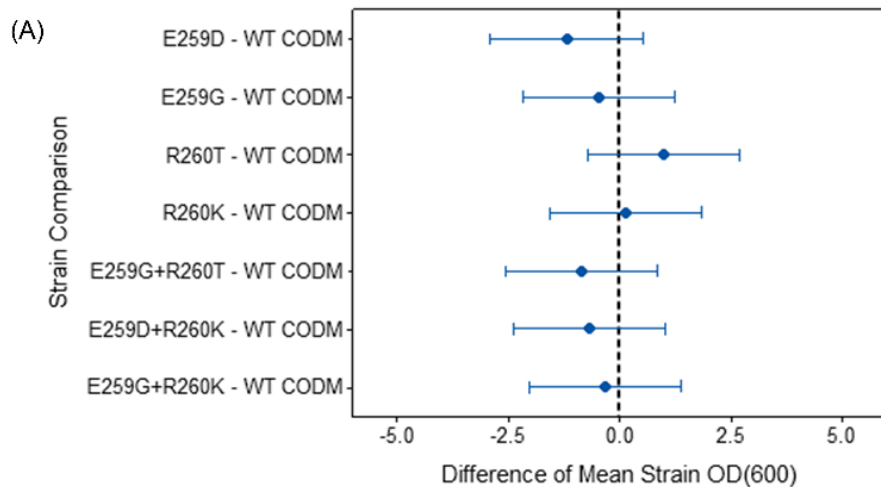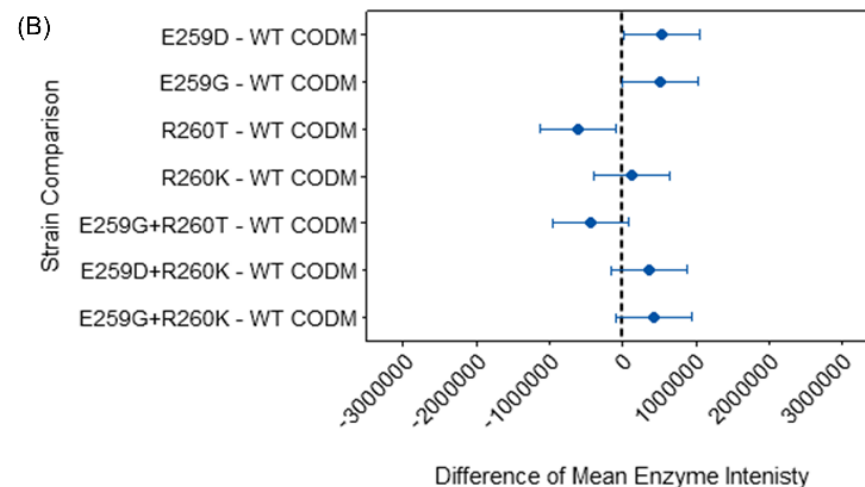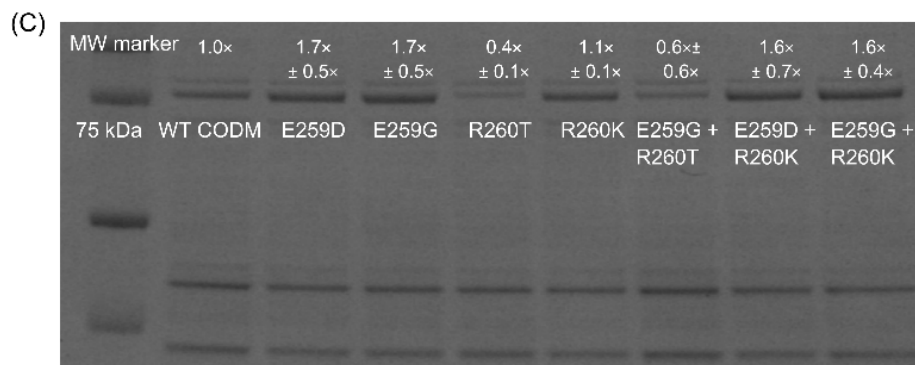

Supplementary Figure. 4 Mean difference in strain OD(600) (A) and mean difference in mutant enzyme intensity (B) of *E. coli* strains following expressing of CODM mutants with varying amino acids at position 259 or 260 or both. Data are mean difference of three independent replicates  $\pm$  95% confidence interval. Representative SDS-PAGE (C) image the *E. coli* strains expressing CODM mutants with varying amino acids at position 259 or 260 or both. Relative expression data are from semi-quantitative analysis of the SDS-PAGE image and are the mean  $\pm$  standard deviation of three independent replicates.



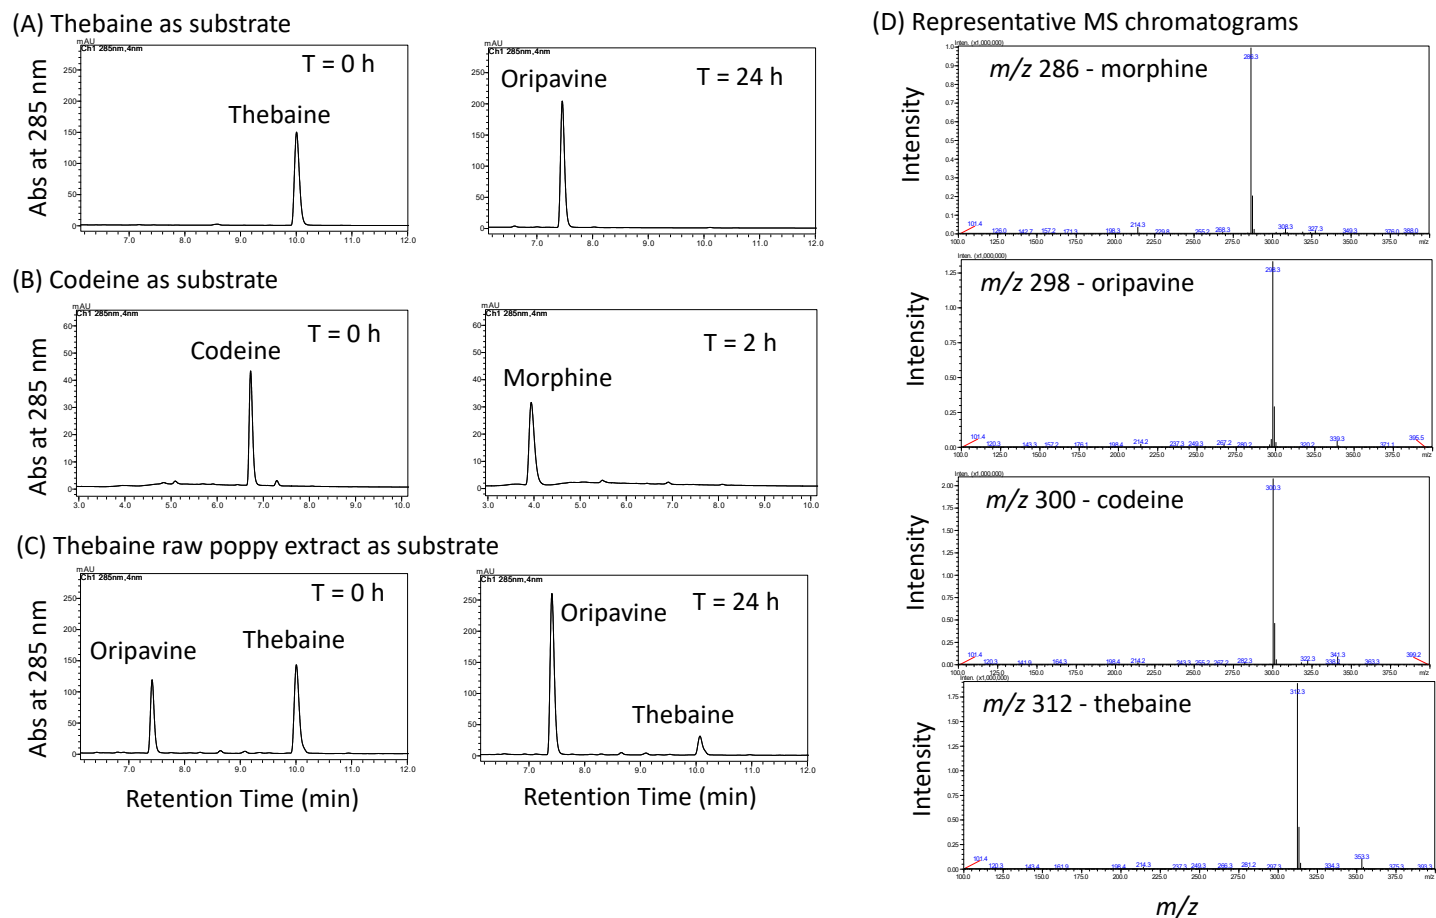

Supplementary Figure. 5 Representative HPLC chromatograms showing the presence of thebaine (retention time of 10.1 minutes) and oripavine (retention time of 7.5 minutes) or codeine (retention time of 6.8 minutes) and morphine (retention time of 4.0 minutes) at 285 nm when pure thebaine (A), pure codeine (B) or raw thebaine extract (C) are used as the feedstock for biotransformation at distinct time points. The presence of oripavine alone (A) or a mixture of oripavine and thebaine (C) is also shown after 24 hours of biotransformation for these feedstocks. Morphine is also shown as a product after 2 hours of biotransformation (B). (D) Representative MS chromatograms

showing the presence of morphine ( $m/z$  286), oripavine ( $m/z$  298), codeine ( $m/z$  300) and thebaine ( $m/z$  312) in the biotransformation reactions.

## References

1. *Natural product extraction : principles and applications / edited by Mauricio A. Rostagno and Juliana M. Prado*, Royal Society of Chemistry, 2013.
2. Y. Chen, H. Lu, N. Zhang, Z. Zhu, S. Wang and M. Li, *PLoS Comput Biol*, 2020, **16**, e1008543.
3. C. Savojardo, P. Fariselli, P. L. Martelli and R. Casadio, *Bioinformatics*, 2016, **32**, 2542-2544.
4. L. Guo, T. Winzer, X. Yang, Y. Li, Z. Ning, Z. He, R. Teodor, Y. Lu, T. A. Bowser, I. A. Graham and K. Ye, *Science (New York, N.Y.)*, 2018, **362**, 343-347.
5. A. Waterhouse, M. Bertoni, S. Bienert, G. Studer, G. Tauriello, R. Gumienny, F. T. Heer, T. A. P. de Beer, C. Rempfer, L. Bordoli, R. Lepore and T. Schwede, *Nucleic Acids Res*, 2018, **46**, W296-w303.
